## Complemented palindrome small RNAs first discovered from SARS coronavirus

Chang Liu<sup>1§</sup>, Ze Chen<sup>23§</sup>, Wenyuan Shen<sup>1</sup>, Deshui Yu<sup>4</sup>, Siyu Li<sup>4</sup>  
Yue Hu<sup>1</sup>, Haishuo Ji<sup>5</sup>, Wenjun Bu<sup>4</sup>, Qingsong Wang<sup>6\*</sup>, Shan Gao<sup>45\*</sup>

1. Laboratory of Medical Molecular Virology, School of Medicine, Nankai University, Tianjin, Tianjin 300071, P.R.China.

2. State Key Laboratory of Veterinary Etiological Biology and Key Laboratory of Veterinary Parasitology of Gansu Province, Lanzhou Veterinary Research Institute, Chinese Academy of Agricultural Science, Lanzhou, Gansu 730046, P.R.China.

3. Co-innovation Center for Prevention and Control of Important Animal Infectious Diseases and Zoonoses, Yangzhou, 225009, P. R. China.

4. College of Life Sciences, Nankai University, Tianjin, Tianjin 300071, P.R.China.

5. Institute of Statistics, Nankai University, Tianjin 300071, P.R.China.

6. Tianjin Research Center of Basic Medical Sciences and Department of Cell Biology, Tianjin Medical University, Tianjin 300070, P.R.China.

<sup>§</sup> These authors contributed equally to this paper.

\* The corresponding authors.

SG : gao\_shan@mail.nankai.edu.cn

## 24 **Abstract**

25  
26  
27  
28  
29  
30  
31  
32  
33  
34  
35  
36  
37  
38  
39  
40  
41  
42  
43  
44  
45  
46  
47  
48  
49  
50  
51  
52  
53  
54  
55

In this study, we reported for the first time the existence of complemented palindrome small RNAs (cpsRNAs) and proposed cpsRNAs and palindrome small RNAs (psRNAs) as a novel class of small RNAs. The first discovered cpsRNA UCUUUAACAAGCUUGUAAAAGA from SARS coronavirus named SARS-CoV-cpsR-22 contained 22 nucleotides perfectly matching its reverse complementary sequence. Further sequence analysis supported that SARS-CoV-cpsR-22 originated from bat betacoronavirus. The results of RNAi experiments showed that one 19-nt segment of SARS-CoV-cpsR-22 significantly induced cell apoptosis. These results suggested that SARS-CoV-cpsR-22 could play a role in SARS-CoV infection or pathogenicity. The discovery of psRNAs and cpsRNAs paved the way to find new markers for pathogen detection and reveal the mechanisms in the infection or pathogenicity from a different point of view. The discovery of psRNAs and cpsRNAs also broaden the understanding of palindrome motifs in animal of plant genomes.

56 **Keyword:** small RNA; siRNA; psRNA; cpsRNA; SARS-CoV

## 57 Introduction

58 Small RNA sequencing (small RNA-seq or sRNA-seq) is used to acquire thousands of short RNA  
59 sequences with lengths of usually less than 50 bp. With sRNA-seq, many novel non-coding RNAs (ncRNAs)  
60 have been discovered. For example, two featured series of rRNA-derived RNA fragments (rRFs) constitute a  
61 novel class of small RNAs [1]. Small RNA-seq has also been used for virus detection in plants [2-4] and  
62 invertebrates [5]. In 2016, Wang *et al.* first used sRNA-seq data from the NCBI SRA database to prove that  
63 sRNA-seq can be used to detect and identify human viruses [6], but the detection results were not as good as  
64 those of plant or invertebrate viruses. To improve virus detection in mammals, our strategy was to detect and  
65 compare featured RNA fragments in plants, invertebrates and mammals using sRNA-seq data. In one  
66 previous study [7], we detected siRNA duplexes induced by plant viruses and analyzed these siRNA  
67 duplexes as an important class of featured RNA fragments. In this study, we detected siRNA duplexes  
68 induced by invertebrate and mammal viruses and unexpectedly discovered another important class of  
69 featured RNA fragments, which were complemented palindrome small RNAs (cpsRNAs). Among all the  
70 detected cpsRNAs, we found a typical 22-nt cpsRNA UCUUUAACAAGCUUGUAAAAGA from SARS  
71 coronavirus (SARS-CoV) strain MA15, which deserved further studies because mice infected with SARS-  
72 CoV MA15 died from an overwhelming viral infection with virally mediated destruction of pneumocytes  
73 and ciliated epithelial cells [8]. Although the palindromic motif TCTTTAACAAGCTTGTTAAAGA was  
74 already observed in a previous study [9], it never be considered to be transcribed as cpsRNAs before our  
75 studies.

76 The first discovered cpsRNA named SARS-CoV-cpsR-22 contained 22 nucleotides perfectly  
77 matching its reverse complementary sequence. In our previous study of mitochondrial genomes, we had  
78 reported for the first time a 20-nt palindrome small RNA (psRNA) named hsa-tiR-MDL1-20 [10]. The  
79 biological functions of hsa-tiR-MDL1-20 had been preliminarily studied in our previous study, while the  
80 biological functions of SARS-CoV-cpsR-22 were still unknown. In this study, we compared the features of  
81 siRNA duplexes induced by mammal viruses with those induced by plant and invertebrate viruses and found  
82 that siRNA duplexes induced by mammal viruses had significantly lower percentages of total sequenced  
83 reads and it seemed that they were only produced from a few sites on the virus genomes. One possible  
84 reason could be a large proportion of sRNA-seq data is from other small RNA fragments caused by the  
85 presence of a number of dsRNA-triggered nonspecific responses such as the type I interferon (IFN)  
86 synthesis [11]. Another possible reason could be the missing siRNA duplexes or siRNA fragments functions  
87 in cells by interaction with host RNAs or proteins. Based on this idea, we suspected that SARS-CoV-cpsR-  
88 22 could play a role in SARS-CoV infection or pathogenicity. Then, we performed RNAi experiments to test  
89 the cellular effects induced by SARS-CoV-cpsR-22 and its segments.

90 In this study, we reported for the first time the existence of cpsRNAs. Further sequence analysis  
91 supported that SARS-CoV-cpsR-22 could originate from bat betacoronaviruses. The results of RNAi

2 experiments showed that one 19-nt segment of SARS-CoV-cpsR-22 significantly induced cell apoptosis.  
3 This study aims to provide useful information for a better understanding of psRNAs and cpsRNAs, which  
4 constitute a novel class of small RNAs. The discovery of psRNAs and cpsRNAs paved the way to find new  
5 markers for pathogen detection and reveal the mechanisms in the infection or pathogenicity from a different  
6 point of view.

7

## 8 **Results and Discussion**

### 9 **Comparison of siRNA-duplexes induced by plant, invertebrate and mammal viruses**

10 In this study, 11 invertebrate viruses were detected using 51 runs of sRNA-seq data (**Supplementary**  
11 **file 1**) and two mammal viruses (H1N1 and SARS-CoV) were detected using 12 runs of sRNA-seq data. In  
12 our previous study, six mammal viruses were detected using 36 runs of sRNA-seq data [6]. The detection of  
13 siRNA-duplexes by 11 invertebrate and eight mammal viruses was performed using a published program in  
14 our previous study [7]. Then, we compared the features of siRNA duplexes induced by invertebrate viruses  
15 (**Figure 1A**) with those induced by plant viruses (**Figure 1B**). The results showed that the duplex length was  
16 the principal factor to determine the read count in both plants and invertebrates. 21-nt siRNA duplexes were  
17 the most abundant duplexes in both plants and invertebrates, followed by 22-nt siRNA duplexes in plants  
18 but 20-nt siRNA duplexes in invertebrates. 21-nt siRNA duplexes with 2-nt overhangs were the most  
19 abundant 21-nt duplexes in plants, while 21-nt siRNA duplexes with 1-nt overhangs were the most abundant  
20 21-nt duplexes in invertebrates but they had a very close read count to that of 21-nt siRNA duplexes with 2-  
21 nt overhangs. 18-nt, 19-nt, 20-nt and 22-nt siRNA duplexes in invertebrates had much higher percentages of  
22 total sequenced reads than those in plants. In addition, 18-nt and 19-nt siRNA duplexes had very close read  
23 counts and 20-nt and 22-nt siRNA duplexes had very close read counts in invertebrates. Since siRNA  
24 duplexes induced by mammal viruses had significantly lower percentages of total sequenced reads, the  
25 comparison of siRNA-duplex features between mammals and invertebrates/or plants could not provide  
26 meaningful results using the existing public data with standard sequencing depth. However, as an  
unexpected result from siRNA-duplex analysis, we discovered cpsRNAs from invertebrate and mammal  
viruses.

19 One typical cpsRNA UCUUUAACAAGCUUGUAAAGA (DQ497008: 25962-25983) located in the  
20 orf3b gene on the SARS-CoV strain MA15 genome was detected in four runs of sRNA-seq data (SRA:  
21 SRR452404, SRR452406, SRR452408 and SRR452410). This cpsRNA was named SARS-CoV-cpsR-22,  
22 which contained 22 nucleotides perfectly matching its reverse complementary sequence (**Figure 2A**). We  
23 also detected one 18-nt and one 19-nt segment of SARS-CoV-cpsR-22, which could also be derived from  
24 siRNA duplexes (**Figure 2B**) but their strands (positive or negative) could not be determined. Among  
25 SARS-CoV-cpsR-22 and its two segments, the 19-nt segment was the most abundant and the 22-nt SARS-  
26 CoV-cpsR-22 was the least abundant.

27

## 28 **Discovery of psRNAs and cpsRNAs**

29 Palindromic motifs are found in published genomes of most species and play important roles in  
30 biological processes. The well-known samples of palindromic DNA motifs include restriction enzyme sites,  
31 methylation sites and palindromic motifs in T cell receptors [12]. In this study, we found that palindromic or  
32 complemented palindrome small RNAs motifs existed ubiquitously in animal virus genomes, but not all of  
33 them were detected to be transcribed and processed into cpsRNAs probably due to inadequate sequencing  
34 depth of the sRNA-seq data. For example, we only found two psRNAs (CUACUGACCAGUCAUC and  
35 AAGGUCUCCUCUGGAA) from 14 palindrome motifs and one cpsRNA SARS-CoV-cpsR-22 from 29  
36 complemented palindrome motifs with size from 14 to 26 nt (**Supplementary file 1**) on the SARS-CoV  
37 genome (GenBank: DQ497008.1) using four runs of sRNA-seq data (**Materials and Methods**). A DNA  
38 palindromic motif is defined as a nucleic acid sequence which is reverse complimentary to itself, while  
39 small RNAs which are reverse complimentary to themselves are defined as cpsRNAs. Accordingly, the  
40 typical psRNA should have a sequence which is 100% identical to its reverse sequence, but most psRNAs  
41 are heteropalindromic or semipalindromic as hsa-tiR-MDL1-20 reported in our previous study [10]. The  
42 psRNA hsa-tiR-MDL1-20 AAAGACACCCCCACAGUUU (NC\_012920: 561-580) contains a 14-nt  
43 region (underlined) which reads the same backward as forward and a 3-nt flanking sequence at the 5' end  
44 which is reverse complimentary to a 3-nt flanking sequence at the 3' end. With these 3-nt flanking  
45 sequences, hsa-tiR-MDL1-20 can form a hairpin as cpsRNAs usually do (**Figure 2A**). Although SARS-  
46 CoV-cpsR-22 is also typical, most of cpsRNAs have mismatches or InDels (Insertions/Deletions) in the  
47 reverse complimentary matches (**Supplementary file 1**). one example is a new Epstein-Barr Virus (EBV)  
48 microRNA precursor (pre-miRNA) with the length of 89 nt reported in our previous study [6]. This pre-  
49 miRNA sequence contains six mismatches and five insertions and only 87.64% (78/89) of the total  
50 nucleotides contributes to reverse complimentary matches.

51

## 52 **Clues to origins of SARS-CoV-cpsR-22**

53 The previously unknown SARS virus generated widespread panic in 2002 and 2003 when it caused 774  
54 deaths and more than 8000 cases of illness. Scientists immediately suspected that civet cats which were only  
55 distantly relatives to house cats may had been SARS-CoV's springboard to human [13]. Later, scientists  
56 concluded that civets were not the original source of SARS. Further investigation showed that genetic  
57 diversity of coronaviruses in bats increased the possibility of variants crossing the species barrier and  
58 causing outbreaks of diseases in human populations [14]. To investigate the origins of SARS-CoV-cpsR-22,  
59 we obtained coronavirus genome sequences associated to bats, palm civets, rats and mice, monkeys, dogs,  
60 bovines, hedgehogs, giraffes, waterbucks and equines from the NCBI GenBank database. The results of  
61 sequence analysis showed that SARS-CoV-cpsR-22 was only located in the orf3b gene encoded by the  
62 betacoronavirus genome. Then, we blasted the orf3b gene from human betacoronavirus (GenBank:

53 DQ497008.1) to all the obtained betacoronavirus genomes, except those for experiments on mice and  
54 monkeys. The results showed that the orf3b gene from human betacoronavirus had homologous genes from  
55 betacoronavirus in bats and palm civets (**Supplementary file 2**) rather than in other species. SARS-CoV-  
56 cpsR-22 also had homologous sequences at a 22-nt locus on bat and civet betacoronavirus genomes. All the  
57 homologous sequences at the 22-nt locus on civet betacoronavirus genomes were identical to SARS-CoV-  
58 cpsR-22, while one of four genotypes at the 22-nt locus on bat betacoronavirus genomes was identical to  
59 SARS-CoV-cpsR-22 (**Figure 2C**). Four genotypes at the 22-nt locus on bat betacoronavirus genomes had no,  
60 one, two and three mismatches to SARS-CoV-cpsR-22 and their corresponding orf3b homologous sequences  
61 had identities of 96.77%, 96.13%, 87.96% and 85.16%. This suggested that one variant containing SARS-  
62 CoV-cpsR-22 could originate from betacoronavirus in bats, then be passed to palm civets and finally to  
63 human. This was consistent with the results of phylogenetic analysis using the orf3b homologous sequences  
64 from bat and civet betacoronavirus genomes (**Figure 2D**). In the phylogenetic tree, all human and civet  
65 betacoronavirus containing SARS-CoV-cpsR-22 was grouped into one clade. The nearest relative of the  
66 human and civet clade was the bat betacoronavirus (GenBank: JX993988.1) containing SARS-CoV-cpsR-22  
67 and the next nearest relative was the bat betacoronavirus (GenBank: DQ412042.1) containing 22-nt  
68 homologous sequence with one mismatch to SARS-CoV-cpsR-22.

69

### 30 **Preliminary studies on biological functions of SARS-CoV-cpsR-22**

31 Our previous study showed that the psRNA hsa-tiR-MDL1-20 contained the Transcription Initiation  
32 Site (TIS) and the Transcription Termination Site (TTS) of the human mitochondrial H-strand and could  
33 involve in mtDNA transcription regulation [10]. This inspired us to speculate that cpsRNAs could have  
34 similar biological functions and we investigated SARS-CoV-cpsR-22 using RNA interference (RNAi).  
35 Then, SARS-CoV-cpsR-22 and its 16-nt, 18-nt, 19-nt and 20-nt segments were designed as siRNA duplexes  
36 and introduced into PC-9 cells by pSIREN-RetroQ plasmid transfection (**Materials and Methods**). As a  
37 result, the 19-nt and 20-nt segment significantly induced cell apoptosis to 2.76 and 1.48 times at 48 hours  
38 after their transfection, respectively. Particularly, the 19-nt segment significantly induced cell apoptosis to  
39 7.94 (36.04/4.54) times at 72 hours after their transfection (**Figure 3**). This corresponded to the 19-nt  
40 segment being the most abundant among all the segments of SARS-CoV-cpsR-22. Using the 19-nt segment,  
41 we also tested cell apoptosis in five other human cell lines and one mouse cell line. The results showed the  
42 19-nt segment significantly induced cell apoptosis in the cell lines of A549, MCF-7 and H1299, but not in  
43 the cell lines of MB231, H520 and L929 (mouse). Since different cell types express specific genes, the 19-nt  
44 segment could silence cell-type specific transcripts to induce cell apoptosis through RNAi. These results  
45 suggested that the 19-nt segment had significant biological functions and could play a role in SARS-CoV  
46 infection or pathogenicity.

47

48

## 29 **Materials and Methods**

### 30 **Datasets and data analysis**

31 All sRNA-seq data were downloaded from the NCBI SRA database. The invertebrate and mammal  
32 viruses were detected from sRNA-seq data using VirusDetect [4] and their genome sequences were  
33 downloaded from the NCBI GenBank database. The description of sRNA-seq data and virus genomes is  
34 presented in **Supplementary file 1**. The cleaning and quality control of sRNA-seq data were performed  
35 using the pipeline Fastq\_clean [15] that was optimized to clean the raw reads from Illumina platforms.  
36 Using the software bowtie v0.12.7 with one mismatch, we aligned all the cleaned sRNA-seq reads to viral  
37 genome sequences and obtained alignment results in SAM format for detection of siRNA duplexes using the  
38 program duplexfinder [7]. Statistical computation and plotting were performed using the software R v2.15.3  
39 with the Bioconductor packages [16]. The orf3b gene from human betacoronavirus (GenBank:  
40 DQ497008.1), its 20 homologous sequences from bat betacoronavirus and nine homologous sequences from  
41 civet betacoronavirus were aligned using ClustalW2 (**Supplementary file 2**). After removal of identical  
42 sequences, the orf3b gene from human betacoronavirus, eight homologous sequences from bat  
43 betacoronavirus and two homologous sequences from civet betacoronavirus were used for phylogenetic  
44 analysis. Since these homologous sequences had high identities (from 85.16% to 99.78%) to the orf3b gene  
45 from DQ497008, the Neighbor Joining (NJ) method was used for phylogenetic analysis.

### 46 **RNAi and cellular experiments**

47 Based on the shRNA design protocol [1], the sequences of SARS-CoV-cpsR-22, its 16-nt, 18-nt, 19-nt  
48 20-nt segments (**Figure 2B**) and their control "CGTACGCGGAATACTTCGA" were selected to use as  
49 target sequences for pSIREN-RetroQ vector construction (Clontech, USA), respectively. PC-9 cells were  
50 divided into six groups named 22, 16, 18, 19, 20 and control for transfection using plasmids containing  
51 SARS-CoV-cpsR-22, its 16-nt, 18-nt, 19-nt, 20-nt segments and control sequences. Each group had three  
52 replicate samples for plasmid transfection and cell apoptosis measurement. Each sample was processed  
53 following the same procedure described below. At 12 h prior to transfection, the PC-9 cells were washed  
54 with PBS and trypsinized. Gbico RPMI-1640 medium was added into the cells, which were then centrifuged  
55 at 1000 rpm for 10 min at 4°C to remove the supernatant. Gbico RPMI-1640 medium (Thermo Fisher  
56 Scientific, USA) containing 10% fetal bovine serum was added to adjust the solvent to reach a volume of 2  
57  $\mu\text{L}$  and contain  $2 \times 10^5$  cells. These cells were seeded in one well of a 6-well plate for plasmid transfection.  
58 The transfection of 2  $\mu\text{g}$  plasmids was performed using 5  $\mu\text{L}$  Lipofectamine 2000 (Life technology, USA)  
59 following the manufacturer's instructions. Cell apoptosis was measured with FITC Annexin V Apoptosis  
60 Detection Kit I (BD Biosciences, USA) following the procedure described below. The cells were washed by  
61 PBS, trypsinized and collected using a 5-mL culture tube at 48 h or 72 h after transfection. The culture tube  
62 was then centrifuged at 1000 rpm for 10 min at 4°C to remove the supernatant. The cells were washed twice

34 with cold PBS and resuspended in 1X Binding Buffer at a concentration of  $1 \times 10^6$  cells/mL. 100  $\mu$ L of the  
35 solution ( $1 \times 10^5$  cells) was transferred to a new culture tube with 5  $\mu$ L of FITC-Annexin V and 5  $\mu$ L PI. The  
36 cells were gently vortexed and incubated for 15 min at room temperature in the dark. 400  $\mu$ L of 1X Binding  
37 Buffer was added to the tube. Finally, this sample was analyzed using a FACSCalibur flow cytometer (BD  
38 Biosciences, USA) within 1 hour. Apoptotic cells were quantified by summing the count of early apoptotic  
39 cells (FITC-Annexin V+/PI-) and that of late apoptotic cells (FITC-Annexin V+/PI+).

40  
41

## 42 **Acknowledgments**

43 We thank Yangguang Han and Jinke Huang from TianJin KeYiJiaXin Technology Co., Ltd for his  
44 professional guidance on the RNAi and cellular experiments.

## 45 **Funding**

46 This work was supported by grants from by Fundamental Research Funds for the Central  
47 Universities (for Nankai University) to Shan Gao, Central Public-Interest Scientific Institution Basal  
48 Research Fund of Lanzhou Veterinary Research Institute of CAAS to Ze Chen, and Natural Science  
49 Foundation of China (81472052) to Qingsong Wang.

50

## 51 **Competing interests**

52 Non-financial competing interests are claimed in this study.

53  
54

## 55 **Authors' contributions**

56 SG conceived this project. SG and QW supervised this project. SG, ZC and ZW analyzed the data. YS  
57 and HC curated the sequences and prepared all the figures, tables and additional files. CL, WS and YH  
58 performed qPCR experiments. SG drafted the main manuscript. DY and WB revised the manuscript. **All**  
59 **authors have read and approved the manuscript.**

50  
51  
52  
53  
54  
55  
56

## 57 **REFERENCES**

58



- 59 1. Chen, Z., Sun, Y., Yang, X., Wu, Z., Guo, K., Niu, X., Wang, Q., Ruan, J., Bu, W., and Gao, S., Two  
70 featured series of rRNA-derived RNA fragments (rRFs) constitute a novel class of small RNAs. *Plos*  
71 *One*, 2017. 12(4): e0176458.
- 72 2. Kreuze, J.F.; Perez, A.; Untiveros, M.; Quispe, D.; Fuentes, S.; Barker, I.; Simon, R. Complete viral  
73 genome sequence and discovery of novel viruses by deep sequencing of small RNAs: A generic  
74 method for diagnosis, discovery and sequencing of viruses. *Virology* 2009, 388, 1–7.
- 75 3. Li, R.; Gao, S.; Hernandez, A.G.; Wechter, W.P.; Fei, Z.; Ling, K. Deep sequencing of small RNAs  
76 in tomato for virus and viroid identification and strain differentiation. *PLoS ONE* 2012, 7, e37127 .
- 77 4. Zheng, Y.; Gao, S.; Chellappan, P.; Li, R.; Marco, G.; Dina, G.; Segundo, F.; Ling, K.; Jan, K.; Fei,  
78 Z. VirusDetect: An automated pipeline for efficient virus discovery using deep sequencing of small  
79 RNAs. *Virology* 2017, 500, 130–138.
- 80 5. Nayak, A.; Tassetto, M.; Kunitomi, M.; Andino, R. RNA interference-mediated intrinsic antiviral  
81 immunity in invertebrates. Springer Berlin Heidelberg 2013, 371, 183–200.
- 82 6. Wang, F.; Sun, Y.; Ruan, J.; Chen, R.; Chen, X.; Chen, C.; Kreuze, J.F.; Fei, Z.; Zhu, X.; Gao, S.  
83 Using small RNA deep sequencing to detect human viruses. *BioMed Res. Int.* 2016, 2016, 2596782 .
- 84 7. Niu, X., Sun, Y., Chen, Z., Li, R., Padmanabhan, C., Ruan, J., Kreuze, J.F., Ling, K., Fei, Z., and  
85 Gao, S., Using Small RNA-seq Data to Detect siRNA Duplexes Induced by Plant Viruses. *Genes*,  
86 2017. 8(6): 163.
- 87 8. Roberts, A., Deming, D., Paddock, C.D., Cheng, A., Yount, B., Vogel, L., Herman, B.D., Sheahan,  
88 T., Heise, M., and Genrich, G.L., A mouse-adapted SARS-coronavirus causes disease and mortality  
89 in BALB/c mice. *PLoS pathogens*, 2007. 3(1): e5.
- 90 9. Chew D.S., Choi K.P., Heidner H., et al. Palindromes in SARS and Other Coronaviruses. *Inform*  
91 *Journal on Computing*, 2004, 16(4):331.
- 92 10. Gao, S., Tian, X., Chang, H., Sun, Y., Wu, Z., Cheng, Z., Dong, P., Zhao, Q., Ruan, J., and Bu, W.,  
93 Two novel lncRNAs discovered in human mitochondrial DNA using PacBio full-length  
94 transcriptome data. *Mitochondrion* 2017, 36:10.1016/j.mito.2017.08.002.
- 95 11. Elbashir, S.M.; Harborth, J.; Weber, K.; Tuschl, T. Analysis of gene function in somatic mammalian  
96 cells using small interfering RNAs. *Methods* 2002, 26, 199–213.
- 97 12. Srivastava, S.K. and Robins, H.S., Palindromic nucleotide analysis in human T cell receptor  
98 rearrangements. *PLoS One*, 2012. 7(12): e52250.
- 99 13. Enserink, M., Clues to the animal origins of SARS. *Science*, 2003. 300(5624): 1351-1351.
- 100 14. Li, W., Shi, Z., Yu, M., Ren, W., Smith, C., Epstein, J.H., Wang, H., Crameri, G., Hu, Z., and Zhang,  
101 H., Bats are natural reservoirs of SARS-like coronaviruses. *Science*, 2005. 310(5748): 676-679.
- 102 15. Zhang, M., Zhan, F., Sun, H., Gong, X., Fei, Z., and Gao, S. Fastq\_clean: An optimized pipeline to  
103 clean the Illumina sequencing data with quality control. in *Bioinformatics and Biomedicine (BIBM)*,  
104 2014 IEEE International Conference on. 2014. IEEE.
- 105 16. Gao, S., Ou, J., and Xiao, K., R language and Bioconductor in bioinformatics applications(Chinese  
106 Edition). 2014, Tianjin: Tianjin Science and Technology Translation Publishing Co., Ltd.
- 107

## 98 **Figure legends**

### 99 **Figure 1. Comparison of siRNA-duplexes induced by plant and invertebrate viruses**

100 All the cleaned sRNA-seq reads were aligned to viral genome sequences using the software bowtie v0.12.7  
101 with one mismatch. The detection of siRNA duplexes was performed using the program duplexfinder [7]. **A.**  
102 The read count of siRNA duplexes varies with the duplex length and the overhang length, using data from  
103 11 invertebrate viral genomes. **B.** The read count of siRNA duplexes varies with the duplex length and the  
104 overhang length, using data from seven plant viral genomes [7].

### 107 **Figure 2. Clues to origins of SARS-CoV-cpsR-22**

18 All the genome sequences are represented by their GenBank accession numbers (e.g. DQ497008). **A.** 16-nt,  
19 18-nt, 19-nt, 20-nt and 22-nt siRNA duplexes were used for RNAi experiments. \*16-nt and 20-nt had not  
20 been detected in this study. **B.** All the homologous sequences at the 22-nt locus on civet betacoronavirus  
21 genomes were identical to SARS-CoV-cpsR-22, while one of four genotypes at the 22-nt locus on bat  
22 betacoronavirus genomes was identical to SARS-CoV-cpsR-22. **C.** The psRNA (heteropalindromic) hsa-tiR-  
23 MDL1 and cpsRNA SARS-CoV-cpsR-22 can form hairpins. **D.** The phylogenetic tree was built by the  
24 Neighbor Joining (NJ) method using the orf3b gene from human betacoronavirus, eight homologous  
25 sequences from bat betacoronavirus and two homologous sequences from civet betacoronavirus. The  
26 branch's length corresponds to an average number of nucleotide changes per 100 nucleotides.

27

### 28 **Figure 3. SARS-CoV-cpsR-22 induced cell apoptosis**

29 PC-9 cells were divided into six groups named 22, 16, 18, 19, 20 and control for transfection using plasmids  
30 containing SARS-CoV-cpsR-22, its 16-nt, 18-nt, 19-nt, 20-nt segments. Each group had three replicate  
31 samples for plasmid transfection and cell apoptosis measurement. Each sample was processed following the  
32 same procedure. Cell apoptosis was measured at 72 h after transfection. The samples in this figure were  
33 selected randomly from their corresponding groups.

34

A.

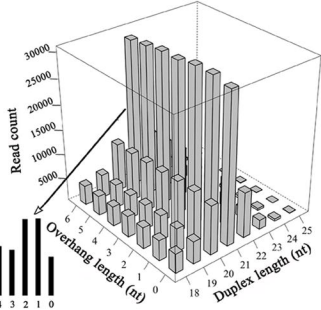

B.

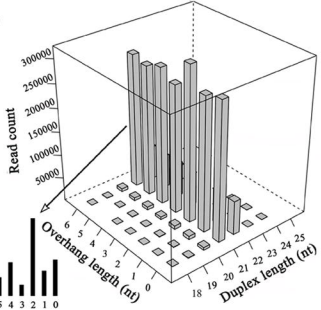

**A.**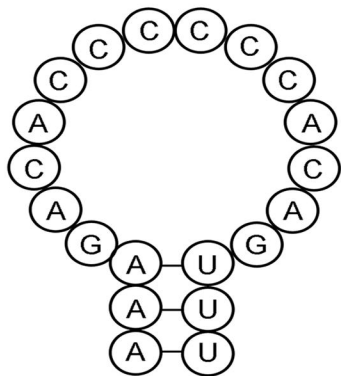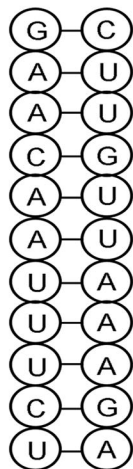**C.**

DQ497008: 25962- TCTTTAACAAGCTTGTTAAAGA-25983

|          |                         |
|----------|-------------------------|
| JX993988 | TCTTTAACAAGCTTGTTAAAGA  |
| DQ412042 | TCTTTAACAAGCTTGTTAAAGGA |
| GQ153539 | TCTATAGCAAGCTTGTTAAAGA  |
| JX993987 | TCTTTAGCAAACTTGTTAAAGC  |

**B.**

|           |                        |         |
|-----------|------------------------|---------|
| Duplex 1* | TTAACAAGCTTGTTAA       | (16 nt) |
| Duplex 2  | TTAACAAGCTTGTTAAAG     | (18 nt) |
| Duplex 3  | TTAACAAGCTTGTTAAAGA    | (19 nt) |
| Duplex 4* | TTAACAAGCTTGTTAAAGA    | (20 nt) |
| Duplex 5  | TCTTTAACAAGCTTGTTAAAGA | (22 nt) |

DQ497008: 25962- TCTTTAACAAGCTTGTTAAAGA-25983

|           |                         |         |
|-----------|-------------------------|---------|
| Duplex 5  | AGAAATTGTTCTGAACAATTTCT | (22 nt) |
| Duplex 4* | AGAAATTGTTCTGAACAATTT   | (20 nt) |
| Duplex 3  | AGAAATTGTTCTGAACAATT    | (19 nt) |
| Duplex 2  | GAAATTGTTCTGAACAATT     | (18 nt) |
| Duplex 1* | AATTGTTCTGAACAATT       | (16 nt) |

**D.**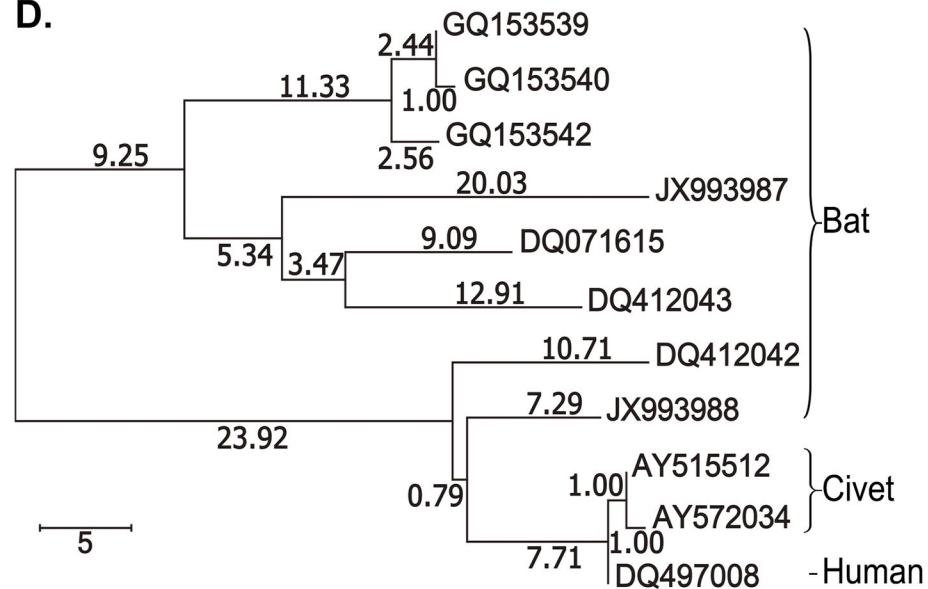

**A****Control**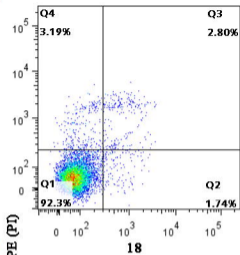**C****19**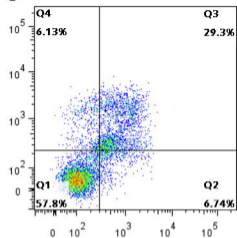**B****18**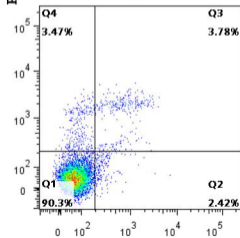**D****20**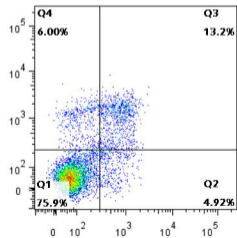

FITC(Annexin V)
